**1 Functional characterization of SARS-CoV-2 infection suggests a complex inflammatory**  
**2 response and metabolic alterations**

3 Lucía Trilla-Fuertes <sup>1</sup>, Ricardo Ramos <sup>2</sup>, Natalia Blanca-López <sup>3</sup>, Elena López-Camacho <sup>1</sup>, Laura  
 4 Martín-Pedraza <sup>3</sup>, Pablo Ryan Murua <sup>5</sup>, Mariana Díaz-Almirón <sup>6</sup>, Carlos Llorens <sup>7</sup>, Toni  
 5 Gabaldón <sup>8,9,10</sup>, Andrés Moya <sup>11,12,13</sup>, Juan Ángel Fresno Vara <sup>1,14,15</sup>, and Angelo Gámez-Pozo <sup>1,14\*</sup>

6 <sup>1</sup> Biomedica Molecular Medicine SL, Madrid, Spain.

7 <sup>2</sup> Genomics Unit, Parque Científico de Madrid, Madrid, Spain.

8 <sup>3</sup> Allergy Service, Infanta Leonor University Hospital, 28031, Madrid, Spain.

9 <sup>4</sup> Allergy Laboratory, Infanta Leonor University Hospital, 28031, Madrid, Spain

10 <sup>5</sup> Internal Medicine Service, Infanta Leonor University Hospital, 28031, Madrid, Spain

11 <sup>6</sup> Biostatistics Unit, Hospital Universitario La Paz, Madrid, Spain.

12 <sup>7</sup> Biotechvana SL, Valencia, Spain.

13 <sup>8</sup> Barcelona Supercomputing Centre (BSC-CNS). Jordi Girona, 29. 08034. Barcelona, Spain.

14 <sup>9</sup> Institute for Research in Biomedicine (IRB Barcelona), The Barcelona Institute of Science and  
 15 Technology, Baldiri Reixac, 10, 08028 Barcelona, Spain

16 <sup>10</sup> Catalan Institution for Research and Advanced Studies (ICREA), Barcelona, Spain

17 <sup>11</sup> Institute for Integrative Systems Biology, University of València and Consejo Superior de  
 18 Investigaciones Científicas, València, Spain.

19 <sup>12</sup> Fundación para el Fomento de la Investigación Sanitaria y Biomédica de la Comunidad  
 20 Valenciana, (FISABIO), València, Spain.

21 <sup>13</sup> CIBER en Epidemiología y Salud Pública (CIBEResp), Madrid, Spain.

22 <sup>14</sup> Molecular Oncology and Pathology Lab, Hospital Universitario La Paz, IDIPAZ, Madrid, Spain.

23 <sup>15</sup> Biomedical Research Networking Center on Oncology-CIBERONC, ISCIII, Madrid, Spain.

24 \*Corresponding author

## 25    **Abstract**

26    Covid-19, caused by the SARS-CoV-2 virus, has reached the category of a worldwide pandemic.  
 27    Even though intensive efforts, no effective treatments or a vaccine are available. Molecular  
 28    characterization of the transcriptional response in Covid-19 patients could be helpful to  
 29    identify therapeutic targets. In this study, RNAseq data from peripheral blood mononuclear  
 30    cell samples from Covid-19 patients and healthy controls was analyzed from a functional point  
 31    of view using probabilistic graphical models. Two networks were built: one based on genes  
 32    differentially expressed between healthy and infected individuals and another one based on  
 33    the 2,000 most variable genes in terms of expression in order to make a functional  
 34    characterization. In the network based on differentially expressed genes, two inflammatory  
 35    response nodes with different tendencies were identified, one related to cytokines and  
 36    chemokines, and another one related to bacterial infections. In addition, differences in  
 37    metabolism, which were studied in depth using Flux Balance Analysis, were identified. SARS-  
 38    CoV2- infection caused alterations in glutamate, methionine and cysteine, and  
 39    tetrahydrobiopterin metabolism. In the network based on 2,000 most variable genes, also two  
 40    inflammatory nodes with different tendencies between healthy individuals and patients were  
 41    identified. Similar to the other network, one was related to cytokines and chemokines.  
 42    However, the other one, lower in Covid-19 patients, was related to allergic processes and self-  
 43    regulation of the immune response. Also, we identified a decrease in T cell node activity and  
 44    an increase in cell division node activity. In the current absence of treatments for these  
 45    patients, functional characterization of the transcriptional response to SARS-CoV-2 infection  
 46    could be helpful to define targetable processes. Therefore, these results may be relevant to  
 47    propose new treatments.

## 48 Introduction

49 The emerging coronavirus SARS-CoV-2 has rapidly expanded from its origin in Wuhan, China,  
50 to become a worldwide pandemic only after four months since its first identification. At  
51 September 20<sup>th</sup> of 2020, 30,675,675 cases and 954,417 deaths have been reported worldwide,  
52 according to the World Health Organization [1].

53 The most common symptoms are fever, cough, fatigue, shortness of breath, accompanied by  
54 elevated inflammatory biomarkers and pulmonary infiltrates. However, during the SARS-CoV-2  
55 infection, a fraction of patients will develop severe pneumonia, pulmonary oedema, severe  
56 acute respiratory syndrome (SARS) or multiple organ failure, ending in death [2]. These severe  
57 symptoms are associated with systemic inflammation related to an overproduction of  
58 macrophagic cytokines. Different treatments focused on these inflammatory processes are  
59 being investigated [3].

60 Recently, Xiong et al. analyzed the transcriptional response in samples from peripheral blood  
61 mononuclear cells (PBMCs) from patients diagnosed with SARS-CoV-2 and compared them  
62 with healthy controls. Based on the results, the authors suggested that patient's lymphopenia  
63 may be caused by an activation of apoptosis in lymphocytes, and also that SARS-Cov-2 induced  
64 excessive cytokine production, which correlates with lung tissue injury [4]. However, these  
65 conclusions were based only in the functional enrichment analysis of differentially expressed  
66 genes.

67 Probabilistic graphical models (PGMs) have demonstrated their utility in analyzing gene  
68 expression data by identifying relevant biological processes [5, 6]. These models allow making  
69 associations between genes according to their expression patterns across a series.

70 Interestingly, the PGM networks have functional structure, allowing study expression data  
71 from a functional point of view. The main advantage of this type of models is that they offer an  
72 integrated view about what biological processes are involved in a disease, instead of the  
73 classical gene-based analysis which offers a list of differential genes without a context. Thus,  
74 we set out to re-analyze Xiong et al. data using PGMs, aiming for a deeper understanding of  
75 biological processes involved in SARS-CoV-2 pathogenesis.

## 76 **Results**

### 77 **Processing of RNA sequencing data**

78 After alignment of raw files, 13,398 expressed genes were identified. After applying the quality  
79 criteria of a detectable reading in at least 50% of the samples, 13,182 genes were used for the  
80 subsequent analyses.

### 81 **Analysis of differential genes between healthy controls and patients**

82 Using CuffDiff, 1,569 differentially expressed genes were determined between SARS-CoV-2  
83 patients and healthy controls. After applying the quality criteria of detectable measurements  
84 in at least 50% of the samples, 1,234 genes remained as differential ones. These genes were  
85 mostly related to inflammatory response, innate immune response, T cells, lysosomes,  
86 apoptotic processes and angiogenesis, among others.

87 A PGM was used to organize these genes according to their biological functions. The resulting  
88 network was composed by eight functional nodes: metabolism, lysosomes, T cells, two nodes  
89 related to inflammatory response, two nodes related to response to virus, and one node with  
90 no overrepresented function (Fig 1, S1 File).

91 Inflammatory response A, lysosome ad metabolism functional nodes activities were  
92 significantly differential between healthy controls and patients. Strikingly, one of the nodes of  
93 inflammatory response had a higher functional node activity in healthy controls than in  
94 patients, and the other node of inflammatory response had a functional node activity higher in  
95 patients than healthy controls. The same tendencies were shown in response to virus nodes.  
96 Lysosome and metabolism had a higher functional node activity in patients than in controls.  
97 Finally, T cell functional node activity was higher in healthy individuals than in patients (Fig 2).

#### 98 *Metabolism functional node*

99 Metabolism node was composed of 102 genes, 19 of them related with metabolism pathways.  
100 This node contained the genes PKM (pyruvate kinase) and PDHB (pyruvate dehydrogenase),  
101 both implicated on glycolysis, and several ATPases from the mitochondrial complex,  
102 responsible for H<sup>+</sup> transporting. There were also genes related to drug metabolism such as  
103 PAPSS1 or CES1.

#### 104 *Inflammatory response A functional node*

105 This node included 236 genes, of which 18 were implicated in an inflammatory response. This  
106 node mostly comprised chemokines such as CXCR2, CCR3, CXCR1, CXCL1 or CXCL8, widely  
107 associated with SARS-CoV-2 infection.

#### 108 *Inflammatory response B functional node*

109 This node included 129 genes, of which 17 were involved in inflammatory response. This  
110 functional node included three toll-like receptors, TLR2, TLR5 and TLR4. Among other  
111 functions, TLR2 promotes apoptosis in response to bacterial lipoproteins. TLR5 protein  
112 recognizes bacterial flagellin, the principal component of bacterial flagella. Additionally, TLR4  
113 has been implicated in signal transduction events induced by lipopolysaccharide found in most  
114 gram negative bacteria. This node also contained AOA1 and CD14, both genes implicated in  
115 response to bacterial lipopolysaccharides as well. Finally, this functional node included VNN1  
116 which plays a suppressive role in influenza virus replication in human alveolar epithelial cells  
117 [7]. Therefore, this node is mostly related to the response to bacterial infections.

#### 118 *Lysosome functional node*

119 Lysosome node included 112 genes, of which 12 were related to lysosomal processes. Most of  
120 these genes are lysosomal enzymes such as CTSH, NAGA or PLA2G15, but this node also  
121 included HPSE, which is the gene that encodes an enzyme that cleaves heparan sulfate  
122 proteoglycans to allow cell movement through remodeling of the extracellular matrix, or  
123 DRAM1, which encodes a lysosomal membrane protein that is required for the induction of  
124 autophagy.

#### 125 **Metabolic modeling**

126 FBA was performed to characterize in depth metabolic alterations caused by SARS-CoV-2  
127 infection (S2 File). Glutamate metabolism, methionine and cysteine metabolism, and  
128 tetrahydrobiopterin metabolism flux activities were differential between healthy controls and  
129 Covid-19 patients (Fig 3). In addition, several tendencies in other metabolic pathways such as  
130 TCA cycle and steroid metabolism that need to be confirmed were shown (S1 Figure).

#### 131 **Functional characterization based on the 2,000 most variable genes**

132 We obtained an alternative PGM network, now based on the 2,000 most variable genes  
133 according to their SD and functionally characterized. The resulting network was divided into  
134 nine functional nodes: apoptosis, oxygen binding, blood coagulation, response to the virus, T  
135 cell, cell division, and three nodes related to an inflammatory response (Fig 4, S3 File).

Cell division and inflammatory response B functional node activities were differential between controls and patients. On the one hand, patients had a higher activity of response to virus, cell division, and one of the inflammatory functional nodes. On the other hand, healthy individuals had a higher activity of T cell and two out of the three functional nodes related to inflammatory processes (Fig 5).

#### *Inflammatory response A functional node*

This node is composed of 77 genes, of which 28 were related to an inflammatory response. Most of these genes were cytokines, chemokines and toll-like receptors, whose function is the modulation of the inflammatory response. This functional node included toll-like receptors TLR6, TLR8, TLR5, TLR1, and TLR4.

#### *Inflammatory response B functional node*

This node was formed by 69 genes, 6 of them related to the inflammatory response. These six genes were CCR3, CCL4L2, TNFRSF18, NCR3, CCL5, and MS4A2. CCL5 and CCL4L2 are chemokine ligands, and CCR3 and MS4A2 are implicated in an allergic response.

#### *Inflammatory response C functional node*

This functional node had 77 genes, 6 of them related to inflammatory processes. These genes were CCL4, CXCR2, FPR2, IL1RAP, CXCL8, and ORM1, mostly of them chemokines.

#### *T cell functional node*

This functional node was composed of 210 genes, 6 of them related to T cells, more concretely with T cell receptors, including GATA3 gene, which plays a vital role in nasopharyngeal virus detection.

#### *Cell division functional node*

This node was composed of 141 genes, 5 of them involved in cell division. These genes were CDK1, CENPW, CCNB1, UBE2C, and CCNB2, mostly related to M-phase promoting factor complex and microtubules.

#### *Response to virus functional node*

This node had 130 genes, nine related to response to virus ontology. This node contained two genes whose proteins are induced by interferon, IFI44L and IFITM3.

# Discussion

SARS-CoV-2 infection has reached the category of a pandemic. Tremendous efforts have been made to find a suitable vaccine and to determine effective treatments but till the date there are neither of them [8].

We have re-analyzed the work of Xiong et al. [4] with a different functional inference approach. Coincidences between both results were expected. Xiong et al. described an up-regulation of genes related to cell cycle and cytokines in SARS-CoV-2 patients, which agreed with the higher functional node activity that we observed in cell division node and one of the inflammatory nodes, mostly composed by cytokines and chemokines. They also described a reduction of immune cells in blood patient samples, which may be related to the lower activity of T cell node in patients than in healthy controls.

Additionally, our analysis offered complementary information. For instance, in the network that characterizes differences between healthy individuals and SARS-CoV-2 patients based on the 1,569 differential genes identified by CuffDiff, two functional nodes related to inflammatory response were identified. Strikingly, inflammatory response A functional node activity was higher in patients than in healthy controls. This node was composed by cytokines and chemokines. However, inflammatory response B node activity, that is related to response to bacterial infections, was higher in healthy controls than in patients. SARS-CoV-2 coexist with a bacterial co-infection of *Mycoplasma pneumoniae* so the study of those genes related to the presence of a bacterial infection in these patients may be relevant [9]. Metabolism node showed also a higher functional node activity in Covid-19 patients than in healthy controls. The increase in glycolysis reactions implies an increase in Krebs cycle reactions as well and therefore in ATP production, essential for the virus replication [10, 11]. The differences on the metabolism functional node suggested that a deeper analysis of metabolism, as Flux Balance Analysis, could supply more detail information. Glutamate metabolism showed differences between controls and Covid-19 patients. Interestingly, an alteration in glutamate metabolism caused by another RNA virus, the HIV-1, has been previously described [11]. Moreover, it has been previously suggested that methionine plays a relevant role in viral replication of other coronaviruses [12]. No alterations in tetrahydrobiopterin metabolism have been previously described related to SARS-CoV-2 infection. However, it is remarkable that tetrahydrobiopterin is a NO synthase cofactor which is involved in immune regulation and inflammation processes. It has been described that a blockade of tetrahydrobiopterin synthesis annuls T-cell mediated autoimmunity and allergic inflammation. On contrast, higher levels of tetrahydrobiopterin

198 increase CD4 and CD8 responses [13]. It has also been described that acute inflammatory  
199 stimulation increases levels of plasma BH4, in parallel with increased IL-6 [14], which it has  
200 been widely associated with SARS-CoV-2 infection and severity [15, 16]. Recent articles where  
201 plasma samples from Covid-19 patients were analyzed by metabolomics have shown  
202 differences in metabolism caused by SARS-CoV-2 infection, especially in steroid, aminoacid and  
203 mitochondrial metabolism [17].

204 Lysosomes have been previously associated with coronaviruses. In 1984, a study described  
205 virus-containing electron-dense bodies in lysosomes of coronavirus-infected cells as a defense  
206 mechanism [18]. Moreover, a study done in murine hepatitis virus, a prototype to study  
207 coronaviruses, established that the virus depends on the lysosomal traffic for a proteolytic  
208 cleavage site in the S protein, necessary for the intracellular fusion and entry [19]. In addition,  
209 this node contains the HPSE genes which it has been previously associated with viral infection  
210 and its activation is associated with a production of pro-inflammatory factors [20].

211 On the other hand, in the network obtained for the 2,000 most variable genes, two functional  
212 nodes related to inflammatory response (inflammatory response A and inflammatory response  
213 B) were also identified. Inflammatory response A functional node was again mostly composed  
214 by cytokines and chemokines. Inflammatory response B functional node had a lower activity in  
215 SARS-CoV-2 patients. Interestingly, the inflammatory response B node was composed of genes  
216 related to allergic response and regulation of immunological self-tolerance. This fact may be  
217 related to the severe acute respiratory syndrome, associated with a dysregulation of the  
218 immune response [2].

219 In this inflammatory response B node is included CCR3, a chemokine highly expressed in  
220 eosinophils and basophils, and is also detected in TH1 and TH2 cells, as well in airway epithelial  
221 cells [21, 22]. This receptor may contribute to the accumulation and activation of inflammatory  
222 cells in allergic airway and it is also known to be an entry co-receptor for HIV-1. MS4A2 is also  
223 implicated in allergic processes [23]. Therefore, this node seems to be more related to the self-  
224 control of the inflammatory response instead of the other inflammatory functional nodes,  
225 more related to chemokines and cytokines.

226 Cell division functional node had a significantly higher activity in Covid-19 patients than in  
227 controls. This node is mainly composed by genes related to M-phase and mitosis process,  
228 which may be related to viral infection. An accumulation of G2/M phase cells in other  
229 coronaviruses has been previously described in order to promote favorable conditions for viral  
230 replication [24].



231 As expected, functional nodes related to response to the virus were relevant in both networks.  
 232 In the case of the network built based on the 2,000 most variable genes, this functional node  
 233 was mainly related to interferon response. Remarkably, this node included IFITM3 gene, which  
 234 codifying sequence is associated with immunity to other well-known viruses such as influenza  
 235 A or dengue virus [25, 26]. IFITM3 protein has been described as related to the entry of MERS-  
 236 CoV and SARS-CoV[27]. The first response to a viral infection of the immune system is  
 237 mediated by interferons so it seems logical that these genes were overexpressed in patients  
 238 infected by SARS-CoV-2. Additionally, interferon-mediated response has been associated with  
 239 severe cases of Covid-19, so a study of the genes included in this functional node in a large  
 240 cohort with different grades of severity of Covid-19 may be interesting [28].

241 In addition, in the T cell functional node appeared GATA3 gene which has been previously  
 242 related to nasopharyngeal virus infections [29]. Since SARS-CoV-2 presents mainly respiratory  
 243 tropism, GATA3 may play an essential role.

244 Our study had some limitations. Probably the most important one was that the reduced  
 245 number of samples limited the statistical power and the information that could be obtained by  
 246 functional analyses. A larger number of samples will be useful to deepen into the molecular  
 247 characterization of this disease. Also, a study based on a larger cohort stratified according the  
 248 severity of the disease could be of much interest as it may help define how functional modules  
 249 vary in relation to the virulence of the infection.

250 In this study, some previously not described relevant processes in SARS-CoV-2 pathogenesis  
 251 such as bacterial inflammatory response processes, tetrahydrobiopterin metabolism or allergic  
 252 processes, were proposed. In the absence of treatments for these patients, molecular  
 253 characterization of the disease could be helpful to improve the understanding of the  
 254 mechanisms of the disease and to define targetable processes. The application of these type of  
 255 analyses in larger cohorts may be useful not just to determine therapeutic targets but also to  
 256 define predictors of immune response to infection. Therefore, these results may be relevant  
 257 to propose new therapeutic treatments in the future.

## 258 **Materials and Methods**

### 259 **Patient cohort**

260 Three samples from peripheral blood mononuclear cells (PBMCs) from three patients infected  
261 with SARS-CoV-2 and three samples from healthy controls were analyzed. These samples are  
262 all from the work of Xiong et al. [4] and raw data can be downloaded from SRA database.

### 263 **Processing of RNA sequencing data**

264 Before processing fragments per kilobase of exon model per million of reads (FPKM) data, we  
265 checked their quality using FastQC (v0.11.9, Brabham, UK). Reads longer than 100 nt showed  
266 the presence of Illumina adapter sequences which were removed by trimming using Prinseq  
267 [30] so all samples were matched to 2x100 format. Then, reads were mapped against the  
268 human genome (GRCh38.96) using TopHat, using an estimated paired-end inner size of 25 and  
269 finally FPKM data were obtained using CuffDiff. All these programs were accessed using the  
270 integrated GPRO suite (Biotechvana, Valencia, Spain) [31].

271 After FPKM processing, Perseus v1.6.5 software was used to filter RNAseq data [32]. Log2 was  
272 calculated and only those genes with at least 50% of the detectable readings were used for the  
273 subsequent analyses.

### 274 **Probabilistic graphical models**

275 2,000 most variable genes were selected according to their standard deviation (SD) of  
276 expression across the series and used to build a PGM network. RNAseq expression data was  
277 used without other a priori information.

278 The resulting network was divided into functional nodes by gene ontology analyses. These  
279 gene ontology analyses were performed in DAVID webtool v8 using "Homo sapiens" as  
280 background and KEGG, Biocarta and GOTERM-FAT as categories [33].

281 The same analysis pipeline was used to characterize the differential genes defined by CuffDiff,  
282 i.e. a network was built using the genes defined as significantly differential between healthy  
283 controls and patients.

284 These analyses were done using *graphD* package [34] and R v3.2.5. Network visualization was  
285 done in Cytoscape [35]. PGMs were built in two steps, first, the spanning tree with the  
286 maximum likelihood was found, and then, the edges were refined based on the minimization  
287 of the Bayesian Information Criterion (BIC) [36].

## 288 **Statistical analysis**

289 Functional node activities were calculated as previously described [6]. Briefly, the mean  
290 expression of those genes of each node related to the overrepresented function in this node  
291 was calculated. Then, functional node activities were compared between healthy individuals  
292 and patients using a T-test.

## 293 **Flux Balance Analysis and metabolic models**

294 Flux Balance Analysis (FBA) allows metabolic modeling from gene expression data. It is widely  
295 used in microbiology and cancer [37]. The complete human metabolic reconstruction Recon 3D  
296 was used to perform these analyses. It contains 10,600 reactions, 5,835 metabolites and 5,939  
297 Gene-Protein-Reaction rules (GPRs), which contain information in the form of Boolean  
298 expressions about which genes are involved in each metabolic reaction. GPRs were solved  
299 using a modification of Barker et al. algorithm [38, 39], solving “AND” expressions as the  
300 minimum and “OR” expressions as the sum. Then, the obtained values were introduced as the  
301 reaction bounds by a modified E-flux algorithm based on the Max-min function [39, 40].  
302 Finally, FBA was solved using COBRA Toolbox library v2.0 [41] and MATLAB.

303 The 10,600 metabolic reactions are grouped into 103 metabolic pathways or subsystems. In  
304 order to compare metabolic activity between controls and Covid-19 patients, flux activities  
305 were calculated as previously described as the sum of fluxes of the reactions contained in a  
306 concrete metabolic pathway [5, 42]. To compare flux activities between control and patients a  
307 T-test was used.

## 308 References

- 309 1. WHO Reports [https://www.who.int/emergencies/diseases/novel-coronavirus-](https://www.who.int/emergencies/diseases/novel-coronavirus-2019/situation-reports/)
- 310 [2019/situation-reports/](https://www.who.int/emergencies/diseases/novel-coronavirus-2019/situation-reports/).
- 311 2. Chen N, Zhou M, Dong X, Qu J, Gong F, Han Y, et al. Epidemiological and clinical
- 312 characteristics of 99 cases of 2019 novel coronavirus pneumonia in Wuhan, China: a
- 313 descriptive study. *Lancet*. 2020;395(10223):507-13. Epub 2020/01/30. doi: 10.1016/S0140-
- 314 6736(20)30211-7. PubMed PMID: 32007143; PubMed Central PMCID: PMC7135076.
- 315 3. Li G, Fan Y, Lai Y, Han T, Li Z, Zhou P, et al. Coronavirus infections and immune
- 316 responses. *J Med Virol*. 2020;92(4):424-32. Epub 2020/02/07. doi: 10.1002/jmv.25685.
- 317 PubMed PMID: 31981224; PubMed Central PMCID: PMC7166547.
- 318 4. Xiong Y, Liu Y, Cao L, Wang D, Guo M, Jiang A, et al. Transcriptomic characteristics of
- 319 bronchoalveolar lavage fluid and peripheral blood mononuclear cells in COVID-19 patients.
- 320 *Emerg Microbes Infect*. 2020;9(1):761-70. doi: 10.1080/22221751.2020.1747363. PubMed
- 321 PMID: 32228226; PubMed Central PMCID: PMC7170362.
- 322 5. Trilla-Fuertes L, Gámez-Pozo A, Arevalillo JM, Díaz-Almirón M, Prado-Vázquez G,
- 323 Zapater-Moros A, et al. Molecular characterization of breast cancer cell response to metabolic
- 324 drugs. *Oncotarget*. 2018;9(11):9645-60. Epub 2018/01/08. doi: 10.18632/oncotarget.24047.
- 325 PubMed PMID: 29515760; PubMed Central PMCID: PMC5839391.
- 326 6. Gámez-Pozo A, Berges-Soria J, Arevalillo JM, Nanni P, López-Vacas R, Navarro H, et al.
- 327 Combined label-free quantitative proteomics and microRNA expression analysis of breast
- 328 cancer unravel molecular differences with clinical implications. *Cancer Res*; 2015. p. 2243-53.
- 329 7. Yamashita N, Yashiro M, Ogawa H, Namba H, Nosaka N, Fujii Y, et al. Metabolic
- 330 pathway catalyzed by Vanin-1 pantetheinase plays a suppressive role in influenza virus
- 331 replication in human alveolar epithelial A549 cells. *Biochem Biophys Res Commun*.
- 332 2017;489(4):466-71. Epub 2017/05/30. doi: 10.1016/j.bbrc.2017.05.172. PubMed PMID:
- 333 28576495.
- 334 8. Kruse RL. Therapeutic strategies in an outbreak scenario to treat the novel coronavirus
- 335 originating in Wuhan, China. *F1000Res*. 2020;9:72. Epub 2020/01/31. doi:
- 336 10.12688/f1000research.22211.2. PubMed PMID: 32117569; PubMed Central PMCID:
- 337 PMC7029759.
- 338 9. Fan BE, Lim KGE, Chong VCL, Chan SSW, Ong KH, Kuperan P. COVID-19 and
- 339 mycoplasma pneumoniae coinfection. *Am J Hematol*. 2020;95(6):723-4. Epub 2020/04/03. doi:
- 340 10.1002/ajh.25785. PubMed PMID: 32173883.
- 341 10. Gerresheim GK, Roeb E, Michel AM, Niepmann M. Hepatitis C Virus Downregulates
- 342 Core Subunits of Oxidative Phosphorylation, Reminiscent of the Warburg Effect in Cancer Cells.
- 343 *Cells*. 2019;8(11). Epub 2019/11/08. doi: 10.3390/cells8111410. PubMed PMID: 31717433;
- 344 PubMed Central PMCID: PMC6912740.
- 345 11. Hegedus A, Kavanagh Williamson M, Khan MB, Dias Zeidler J, Da Poian AT, El-Bacha T,
- 346 et al. Evidence for Altered Glutamine Metabolism in Human Immunodeficiency Virus Type 1
- 347 Infected Primary Human CD4. *AIDS Res Hum Retroviruses*. 2017;33(12):1236-47. Epub
- 348 2017/10/04. doi: 10.1089/AID.2017.0165. PubMed PMID: 28844150; PubMed Central PMCID:
- 349 PMC5709700.
- 350 12. Chen Y, Su C, Ke M, Jin X, Xu L, Zhang Z, et al. Biochemical and structural insights into
- 351 the mechanisms of SARS coronavirus RNA ribose 2'-O-methylation by nsp16/nsp10 protein
- 352 complex. *PLoS Pathog*. 2011;7(10):e1002294. Epub 2011/10/13. doi:
- 353 10.1371/journal.ppat.1002294. PubMed PMID: 22022266; PubMed Central PMCID:
- 354 PMC3192843.
- 355 13. Cronin SJF, Seehus C, Weidinger A, Talbot S, Reissig S, Seifert M, et al. The metabolite
- 356 BH4 controls T cell proliferation in autoimmunity and cancer. *Nature*. 2018;563(7732):564-8.

357 Epub 2018/11/07. doi: 10.1038/s41586-018-0701-2. PubMed PMID: 30405245; PubMed  
358 Central PMCID: PMC6438708.

359 14. Antoniadou C, Cunningham C, Antonopoulos A, Neville M, Margaritis M, Demosthenous  
360 M, et al. Induction of vascular GTP-cyclohydrolase I and endogenous tetrahydrobiopterin  
361 synthesis protect against inflammation-induced endothelial dysfunction in human  
362 atherosclerosis. *Circulation*. 2011;124(17):1860-70. Epub 2011/10/03. doi:  
363 10.1161/CIRCULATIONAHA.111.029272. PubMed PMID: 21969008; PubMed Central PMCID:  
364 PMC65238937.

365 15. Magro G. SARS-CoV-2 and COVID-19: Is interleukin-6 (IL-6) the 'culprit lesion' of ARDS  
366 onset? What is there besides Tocilizumab? *SGP130Fc. Cytokine X*. 2020;2(2):100029. Epub  
367 2020/05/14. doi: 10.1016/j.cytok.2020.100029. PubMed PMID: 32421092; PubMed Central  
368 PMCID: PMC67224649.

369 16. Gubernatorova EO, Gorshkova EA, Polinova AI, Drutskaya MS. IL-6: Relevance for  
370 immunopathology of SARS-CoV-2. *Cytokine Growth Factor Rev*. 2020;53:13-24. Epub  
371 2020/05/20. doi: 10.1016/j.cytogfr.2020.05.009. PubMed PMID: 32475759; PubMed Central  
372 PMCID: PMC67237916.

373 17. Shen B, Yi X, Sun Y, Bi X, Du J, Zhang C, et al. Proteomic and Metabolomic  
374 Characterization of COVID-19 Patient Sera. *Cell*. 2020;182(1):59-72.e15. Epub 2020/05/28. doi:  
375 10.1016/j.cell.2020.05.032. PubMed PMID: 32492406; PubMed Central PMCID:  
376 PMC67254001.

377 18. Ducatelle R, Hoorens J. Significance of lysosomes in the morphogenesis of  
378 coronaviruses. *Arch Virol*. 1984;79(1-2):1-12. doi: 10.1007/BF01314299. PubMed PMID:  
379 6320768; PubMed Central PMCID: PMC67086738.

380 19. Burkard C, Verheije MH, Wicht O, van Kasteren SI, van Kuppeveld FJ, Haagmans BL, et  
381 al. Coronavirus cell entry occurs through the endo-/lysosomal pathway in a proteolysis-  
382 dependent manner. *PLoS Pathog*. 2014;10(11):e1004502. Epub 2014/11/06. doi:  
383 10.1371/journal.ppat.1004502. PubMed PMID: 25375324; PubMed Central PMCID:  
384 PMC64223067.

385 20. Agelidis A, Shukla D. Heparanase, Heparan Sulfate and Viral Infection. *Adv Exp Med  
386 Biol*. 2020;1221:759-70. doi: 10.1007/978-3-030-34521-1\_32. PubMed PMID: 32274736.

387 21. Beck LA, Tancowny B, Brummet ME, Asaki SY, Curry SL, Penno MB, et al. Functional  
388 analysis of the chemokine receptor CCR3 on airway epithelial cells. *J Immunol*.  
389 2006;177(5):3344-54. doi: 10.4049/jimmunol.177.5.3344. PubMed PMID: 16920975.

390 22. Khanolkar A, Burden SJ, Hansen B, Wilson AR, Philipps GJ, Hill HR. Evaluation of CCR3  
391 as a basophil activation marker. *Am J Clin Pathol*. 2013;140(3):293-300. doi:  
392 10.1309/AJCLPSNORQKHJX1A. PubMed PMID: 23955446.

393 23. Guo H, Peng T, Luo P, Li H, Huang S, Li S, et al. Association of FcεRIβ polymorphisms  
394 with risk of asthma and allergic rhinitis: evidence based on 29 case-control studies. *Biosci Rep*.  
395 2018;38(4). Epub 2018/07/31. doi: 10.1042/BSR20180177. PubMed PMID: 29654163; PubMed  
396 Central PMCID: PMC666650.

397 24. Dove B, Brooks G, Bicknell K, Wurm T, Hiscox JA. Cell cycle perturbations induced by  
398 infection with the coronavirus infectious bronchitis virus and their effect on virus replication. *J  
399 Virol*. 2006;80(8):4147-56. doi: 10.1128/JVI.80.8.4147-4156.2006. PubMed PMID: 16571830;  
400 PubMed Central PMCID: PMC6440480.

401 25. Prabhu SS, Chakraborty TT, Kumar N, Banerjee I. Association between IFITM3 rs12252  
402 polymorphism and influenza susceptibility and severity: A meta-analysis. *Gene*. 2018;674:70-9.  
403 Epub 2018/06/22. doi: 10.1016/j.gene.2018.06.070. PubMed PMID: 29940276.

404 26. Allen EK, Randolph AG, Bhangale T, Dogra P, Ohlson M, Oshansky CM, et al. SNP-  
405 mediated disruption of CTCF binding at the IFITM3 promoter is associated with risk of severe  
406 influenza in humans. *Nat Med*. 2017;23(8):975-83. Epub 2017/07/17. doi: 10.1038/nm.4370.  
407 PubMed PMID: 28714988; PubMed Central PMCID: PMC65702558.

27. Zhao X, Sehgal M, Hou Z, Cheng J, Shu S, Wu S, et al. Identification of Residues Controlling Restriction versus Enhancing Activities of IFITM Proteins on Entry of Human Coronaviruses. *J Virol*. 2018;92(6). Epub 2018/02/26. doi: 10.1128/JVI.01535-17. PubMed PMID: 29263263; PubMed Central PMCID: PMC5827390.
28. Lee JS, Park S, Jeong HW, Ahn JY, Choi SJ, Lee H, et al. Immunophenotyping of COVID-19 and influenza highlights the role of type I interferons in development of severe COVID-19. *Sci Immunol*. 2020;5(49). doi: 10.1126/sciimmunol.abd1554. PubMed PMID: 32651212; PubMed Central PMCID: PMC7402635.
29. Jarrold T, Palomares O, Waris M, Tantan O, Nieminen R, Puhakka T, et al. Distinct regulation of tonsillar immune response in virus infection. *Allergy*. 2014;69(5):658-67. Epub 2014/03/29. doi: 10.1111/all.12396. PubMed PMID: 24684577; PubMed Central PMCID: PMC37159333.
30. Schmieder R, Edwards R. Quality control and preprocessing of metagenomic datasets. *Bioinformatics*. 2011;27(6):863-4. Epub 2011/01/28. doi: 10.1093/bioinformatics/btr026. PubMed PMID: 21278185; PubMed Central PMCID: PMC3051327.
31. Futami R, Muñoz-Pomer A, Viu J, Domínguez-Escribá R, Covelli L, Bernet G, et al. GPRO The professional tool for annotation, management and functional analysis of omic databases. *Biotechniques Bioinformatics: SOFT3*. 2011.
32. Tyanova S, Temu T, Sinitcyn P, Carlson A, Hein MY, Geiger T, et al. The Perseus computational platform for comprehensive analysis of (prote)omics data. *Nat Methods*. 2016;13(9):731-40. Epub 2016/06/27. doi: 10.1038/nmeth.3901. PubMed PMID: 27348712.
33. Huang dW, Sherman BT, Lempicki RA. Systematic and integrative analysis of large gene lists using DAVID bioinformatics resources. *Nat Protoc*. 2009;4(1):44-57. doi: 10.1038/nprot.2008.211. PubMed PMID: 19131956.
34. Abreu G, Edwards D, Labouriau R. High-Dimensional Graphical Model Search with the gRapHD R Package *Journal of Statistical Software* 2010. p. 1-18.
35. Shannon P, Markiel A, Ozier O, Baliga NS, Wang JT, Ramage D, et al. Cytoscape: a software environment for integrated models of biomolecular interaction networks. *Genome Res*. 2003;13(11):2498-504. doi: 10.1101/gr.1239303. PubMed PMID: 14597658; PubMed Central PMCID: PMC403769.
36. Lauritzen S. Graphical Models. Oxford, UK.: Oxford University Press 1996.
37. Orth J, Thiele I, Palsson B. What is flux balance analysis? : *Nat Biotechnol*; 2010. p. 245-8.
38. Barker BE, Sadagopan N, Wang Y, Smallbone K, Myers CR, Xi H, et al. A robust and efficient method for estimating enzyme complex abundance and metabolic flux from expression data. *Comput Biol Chem*. 2015;59 Pt B:98-112. Epub 2015/09/01. doi: 10.1016/j.compbiolchem.2015.08.002. PubMed PMID: 26381164; PubMed Central PMCID: PMC4684447.
39. Gámez-Pozo A, Trilla-Fuertes L, Berges-Soria J, Selevsek N, López-Vacas R, Díaz-Almirón M, et al. Functional proteomics outlines the complexity of breast cancer molecular subtypes. *Scientific Reports*. 2017;7(1):10100. doi: 10.1038/s41598-017-10493-w.
40. Colijn C, Brandes A, Zucker J, Lun D, Weiner B, Farhat M, et al. Interpreting expression data with metabolic flux models: Predicting Mycobacterium tuberculosis mycolic acid production. *PLOS Comput Bio*; 2009.
41. Schellenberger J, Que R, Fleming R, Thiele I, Orth J, Feist A, et al. Quantitative prediction of cellular metabolism with constraint-based models: the COBRA Toolbox v2.0. *Nature Protocols*; 2011. p. 1290-307.
42. Trilla-Fuertes L, Gámez-Pozo A, Díaz-Almirón M, Prado-Vázquez G, Zapater-Moros A, López-Vacas R, et al. Computational metabolism predicts risk of distant relapse-free survival in breast cancer patients. *Future Oncology*. 2019;30:3483-90. doi: 10.2217/fon-2018-0698.

## 458 Funding

459 GPRO is supported by TSI-100903-2019-11 from Secretaría de Estado de Digitalización e  
460 Inteligencia Artificial, Ministerio de Asuntos Económicos y Transformación Digital. This work  
461 was supported by grants to AM from the Spanish Ministry of Economy and Competitiveness  
462 (SAF2015-65878-R) and Generalitat Valenciana (Prometeo/2018/A/133), and co-financed by  
463 the European Regional Development Fund (ERDF). LT-F is supported by the Spanish Economy  
464 and Competitiveness Ministry (DI-15-07614). EL-C is supported by the Spanish Economy and  
465 Competitiveness Ministry (PTQ2018-009760).

## 466 **Figure legends**

467 **Fig 1: Probabilistic graphical model based on the expression of 1,234 differential genes**  
468 **between healthy individuals and patients.**

469 **Fig 2: Functional node activities from the network based on the expression of the 1,234**  
470 **genes defined as significantly differential by CuffDiff.** In the Y axis the activity of the  
471 functional node in arbitrary units, understanding as the mean expression of those genes in  
472 each node that were related to the overrepresented function in the node. In the x axis, healthy  
473 controls and Covid-19 patients. \*\*,  $\leq 0.01$  ; \*  $\leq 0.05$ .

474 **Fig 3: Differential flux activities between healthy controls and patients.** a.u. = arbitrary units.  
475 \*  $p < 0.05$ .

476 **Fig 4: Probabilistic graphical model based on the expression of the 2,000 most variable**  
477 **genes.**

478 **Fig 5: Functional node activities from the network based on the expression of the 2,000 most**  
479 **variable genes.** In the Y axis the activity of the functional node in arbitrary units,  
480 understanding as the mean expression of those genes in each node that were related to the  
481 overrepresented function. In the X axis, healthy controls and Covid-19 patients. \*\*\*,  $\leq 0.001$ ;  
482 \*\*,  $\leq 0.01$  ; \*  $\leq 0.05$ .

## 483 **Supporting information**

484 S1 File: Genes included in the probabilistic graphical model based on the expression of 1,234  
485 differential genes between healthy individuals and patients.

486 S2 File: Genes included the probabilistic graphical model based on the expression of the 2,000  
487 most variable genes.

488 S3 File: Flux Balance Analysis results.

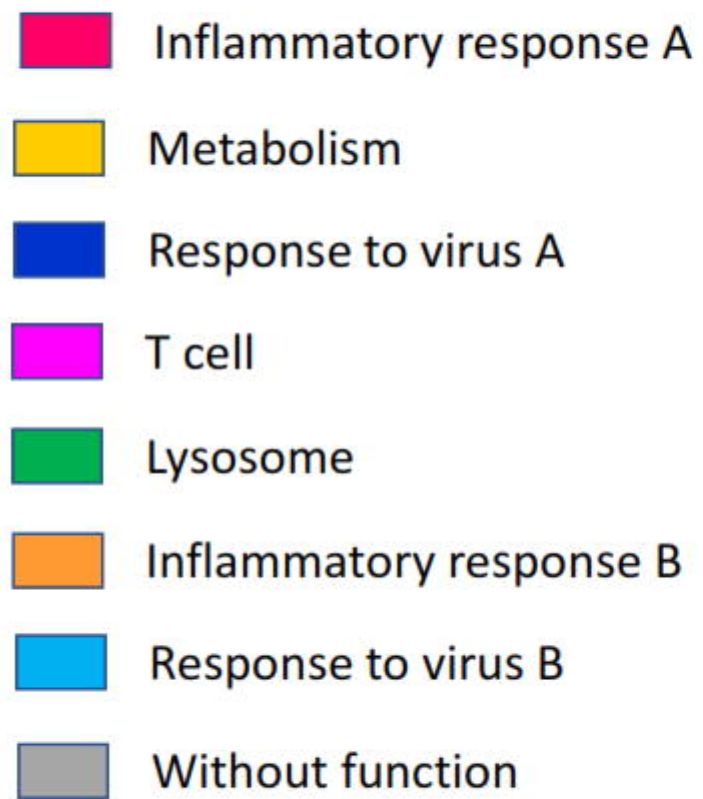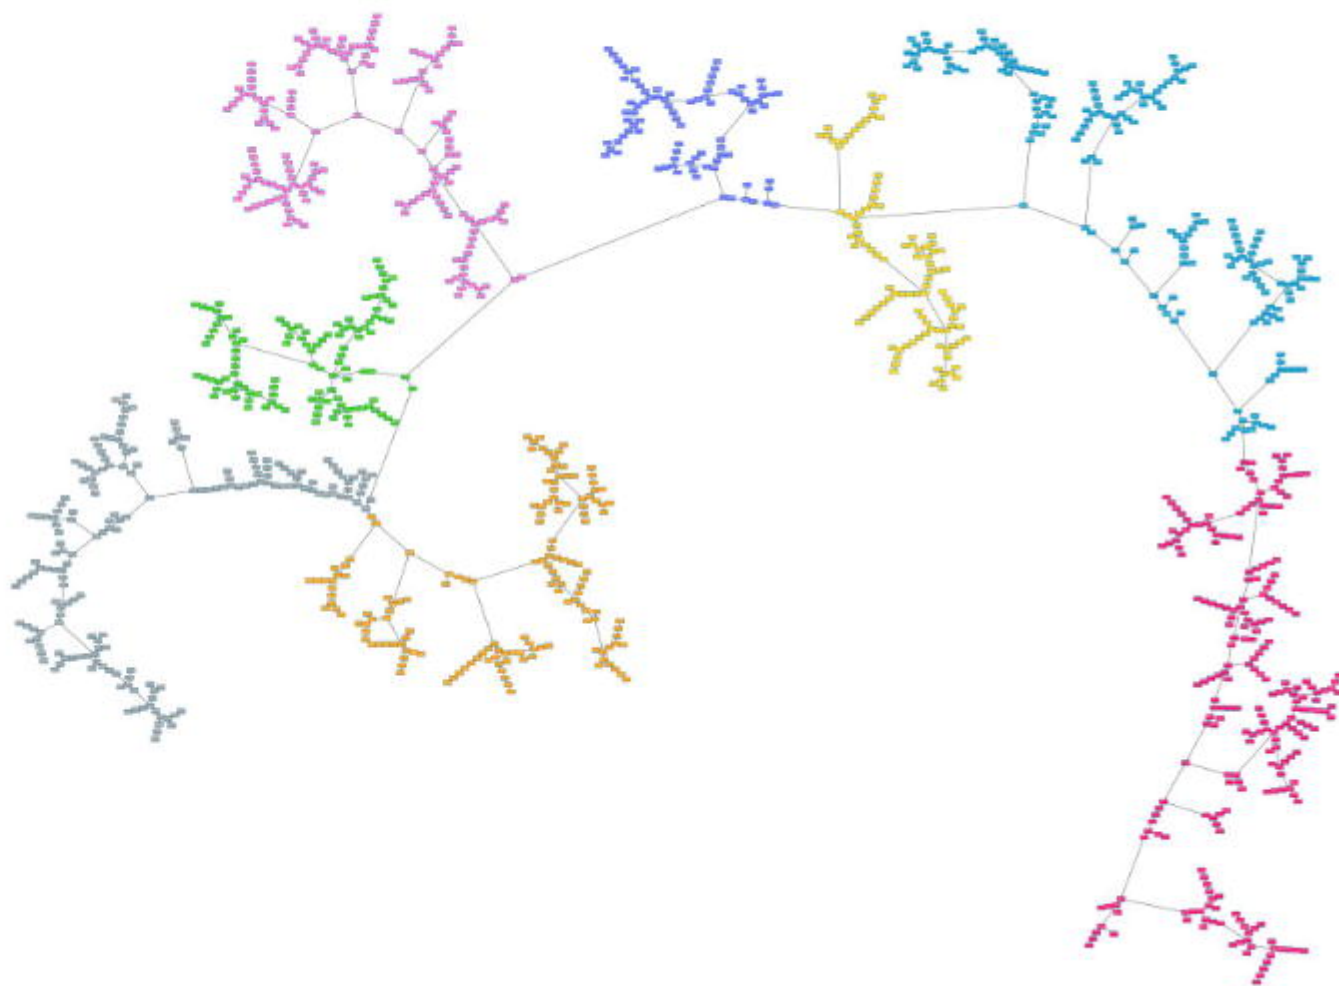



Inflammatory response A

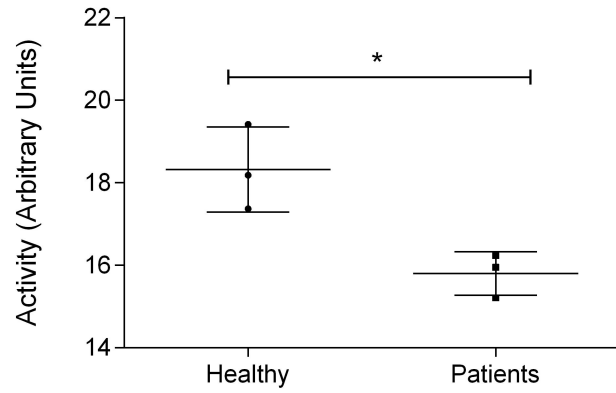

Inflammatory response B

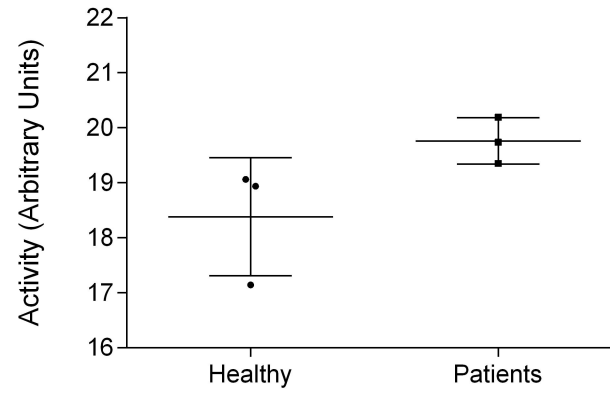

Lysosome

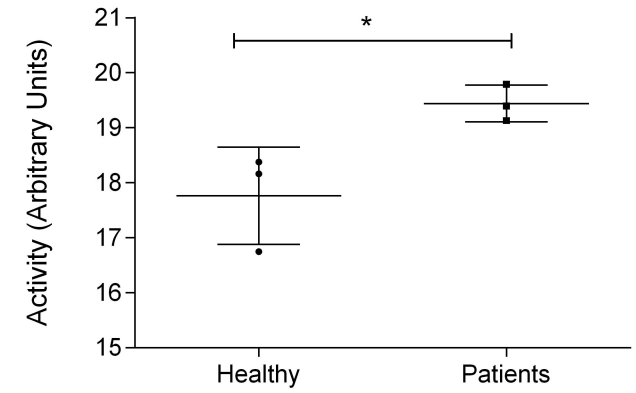

T cell

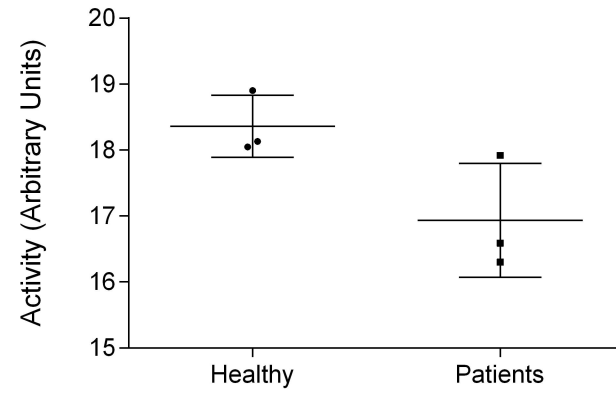

Response to virus A

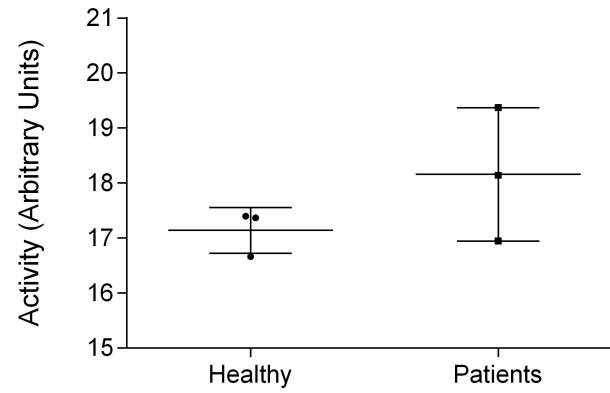

Metabolism

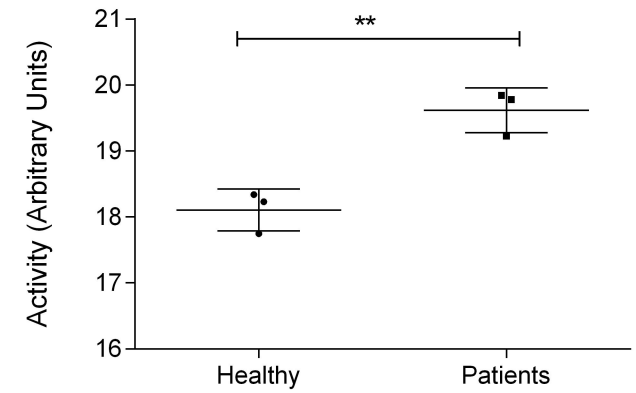

Response to virus B

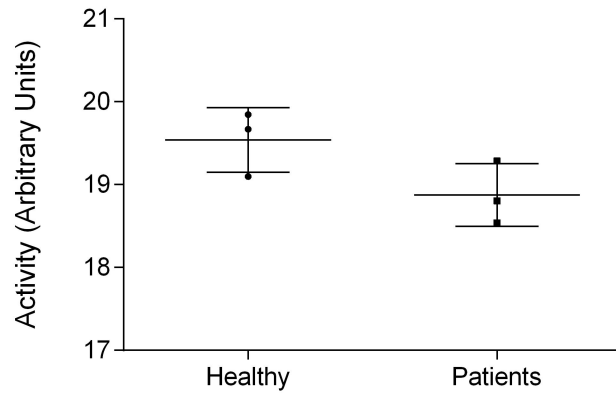

Glutamate metabolism

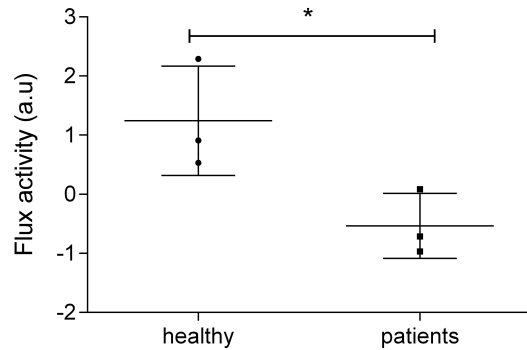

Methionine metabolism

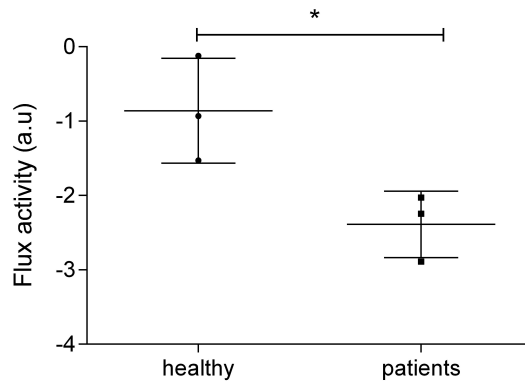

Tetrahydrobiopterin metabolism

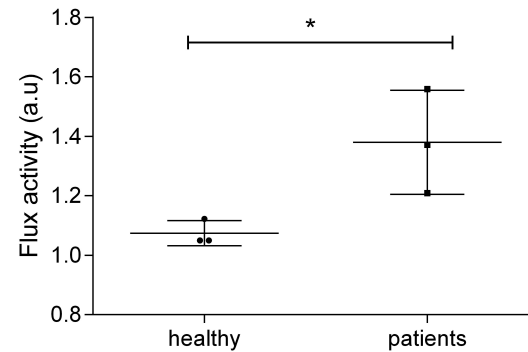

TCA

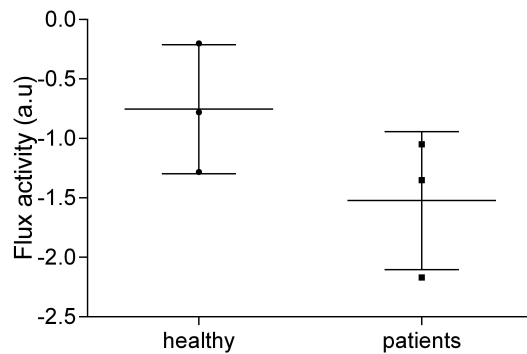

Steroid metabolism

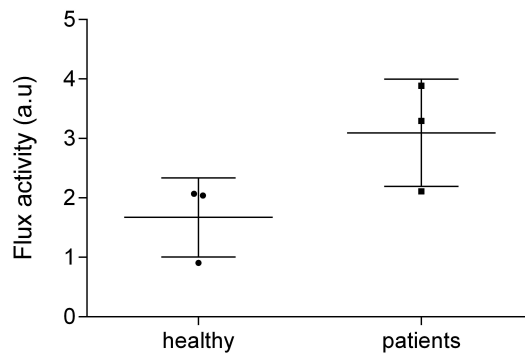

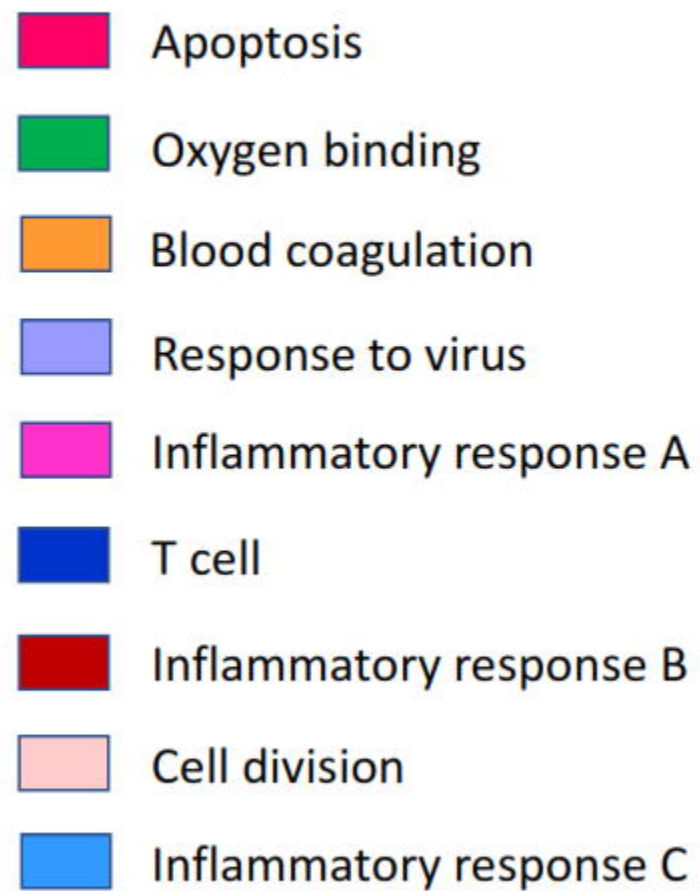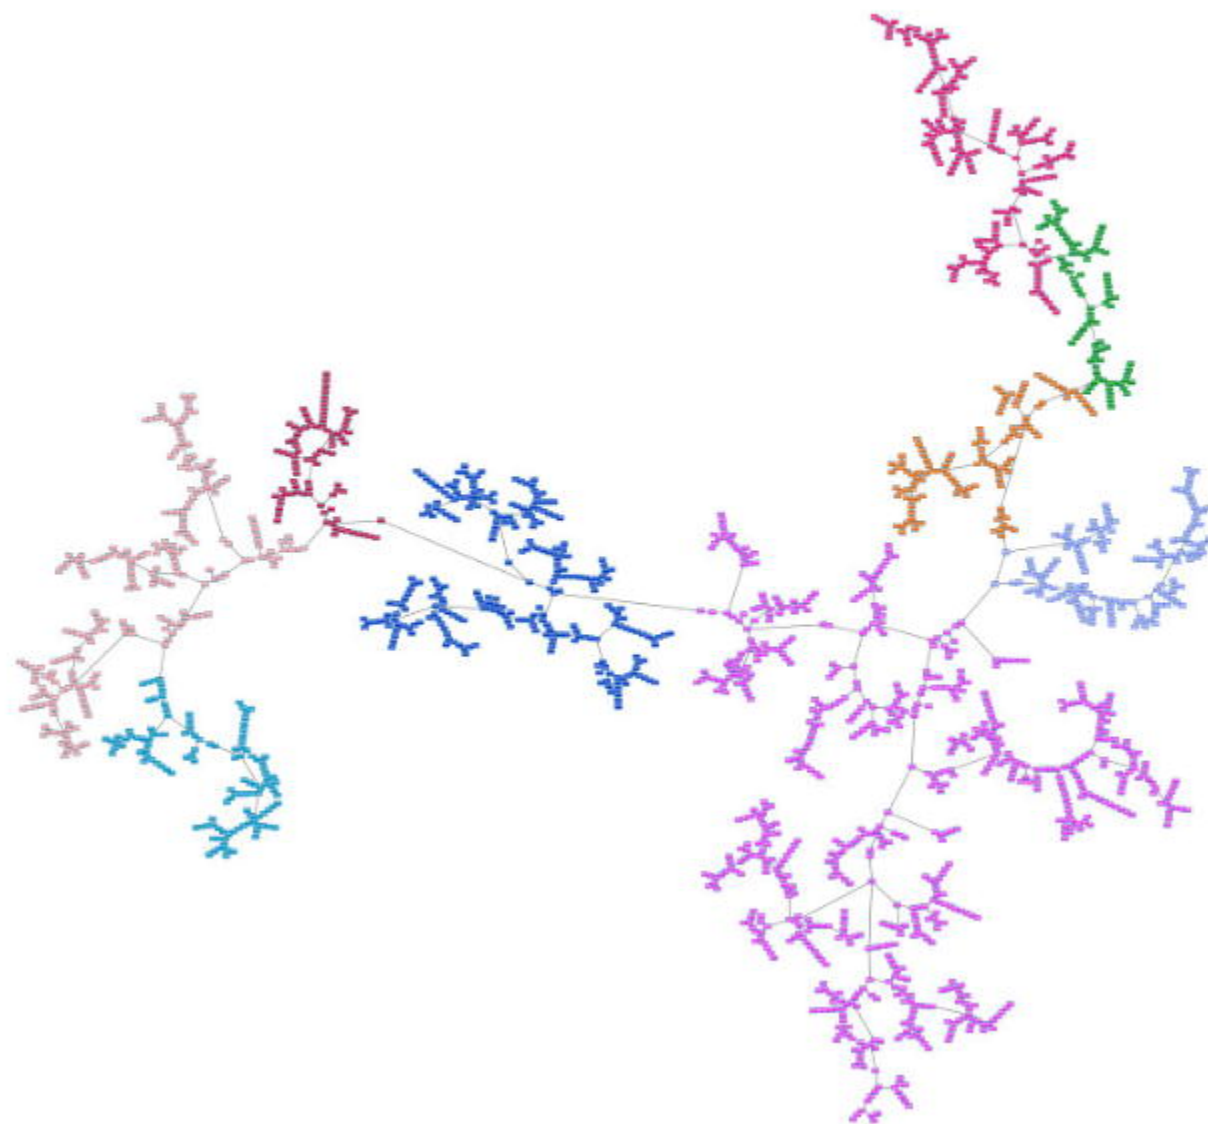

Apoptosis

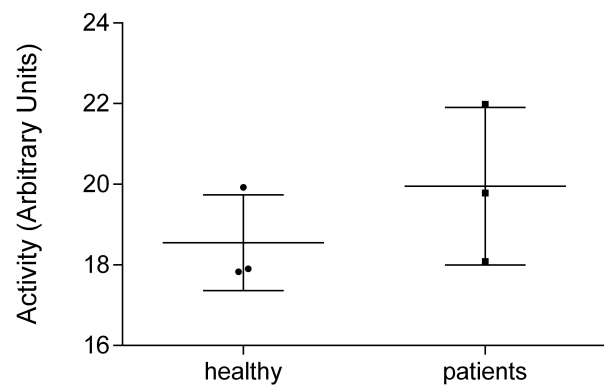

Oxygen binding

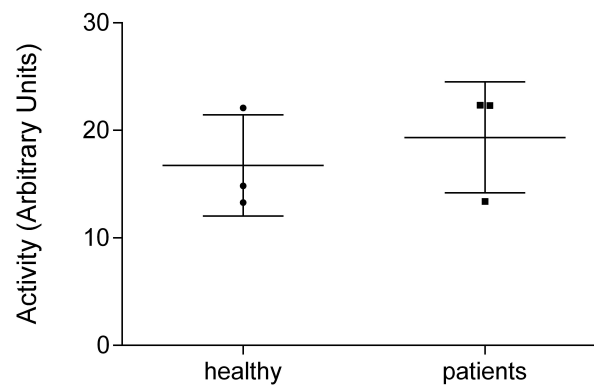

Blood coagulation

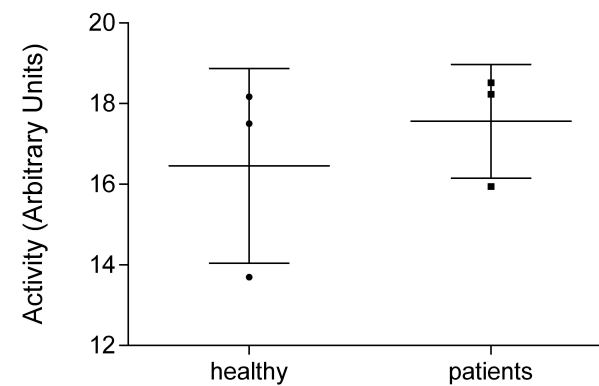

Response to virus

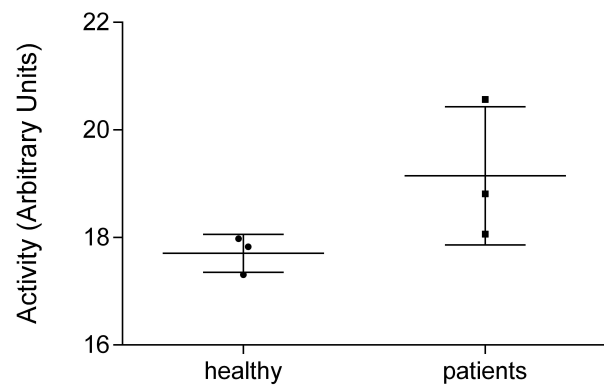

Inflammatory response A

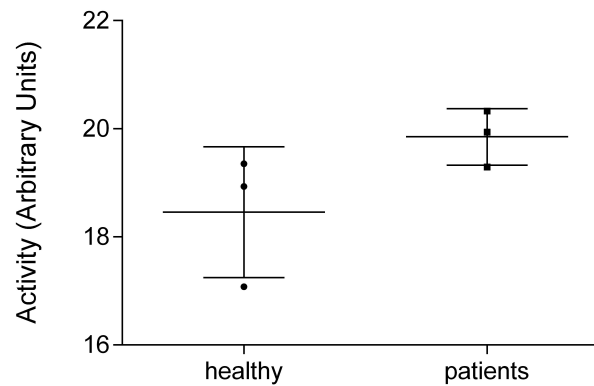

T cell

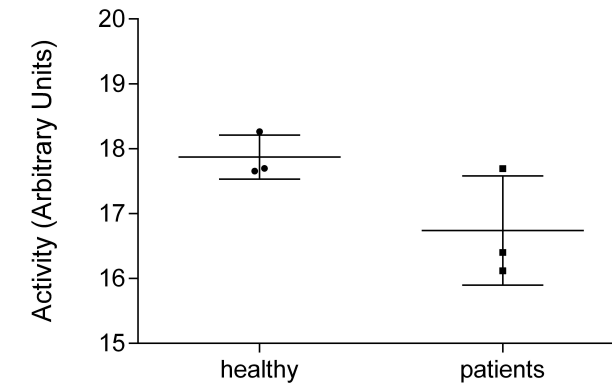

Cell division

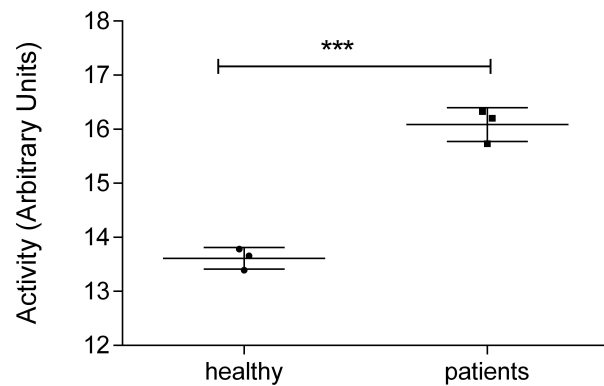

Inflammatory response B

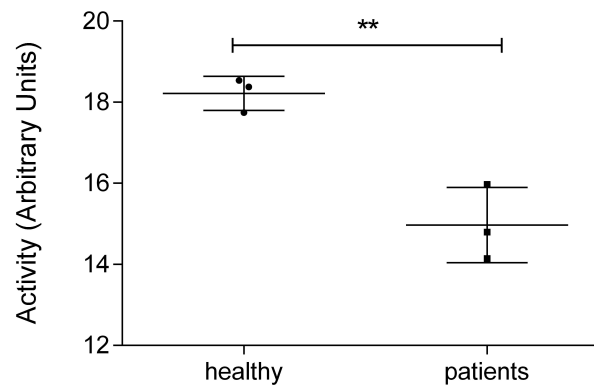

Inflammatory response C

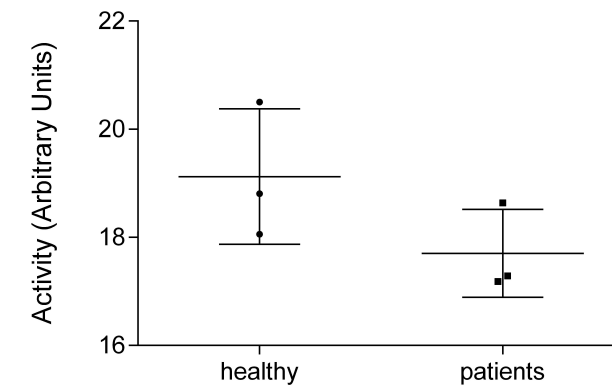

Source: https://www.biorxiv.org/content/10.1101/2020.06.22.164384v2.full.pdf
